# Supplementary material
Source: PubMed Central journal article supplement (PMC4955782)
Supplement: NIHMS796876-supplement.pdf [file NIHMS796876-supplement.pdf]

**SUPPLEMENTARY MATERIAL FOR:**

**(-)-RHAZINILAM AND THE DIPHENYLPYRIDAZINONE NSC 613241: TWO  
COMPOUNDS INDUCING THE FORMATION OF MORPHOLOGICALLY SIMILAR  
TUBULIN SPIRALS BUT BINDING APPARENTLY TO TWO DISTINCT SITES ON  
TUBULIN**

Ruoli Bai and Ernest Hamel

Screening Technologies Branch  
Developmental Therapeutics Program  
Division of Cancer Treatment and Diagnosis  
National Cancer Institute  
Frederick National Laboratory for Cancer Research  
National Institutes of Health  
Frederick, Maryland 21702

Address correspondence to Dr. Ernest Hamel, Building 322, Room 102, Frederick National Laboratory for Cancer Research, Frederick MD 21702.

Telephone: 301-846-1678

FAX: 301-846-6014

email: [hamele@mail.nih.gov](mailto:hamele@mail.nih.gov)

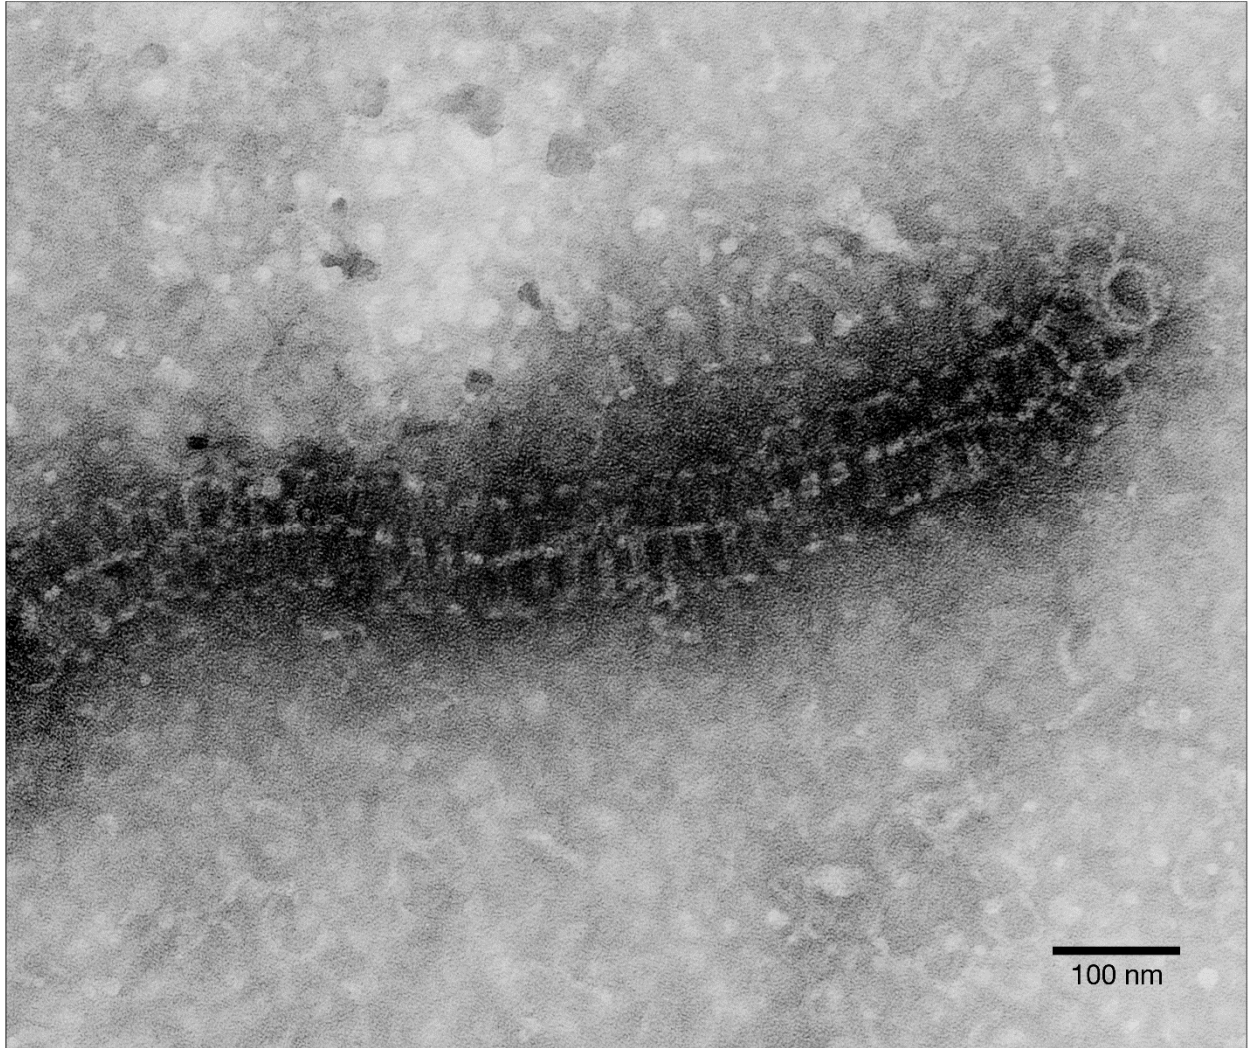

Supplementary Materials Figure 1: Vinca-induced tubulin structure with individual coils prominent. The reaction mixture contained 10  $\mu\text{M}$  tubulin, 0.75 M monosodium glutamate, 20  $\mu\text{M}$  vinblastine, and 10  $\mu\text{M}$  GTP. The tubulin used in this study was not subjected to gel filtration chromatography.

### A. NSC 613241

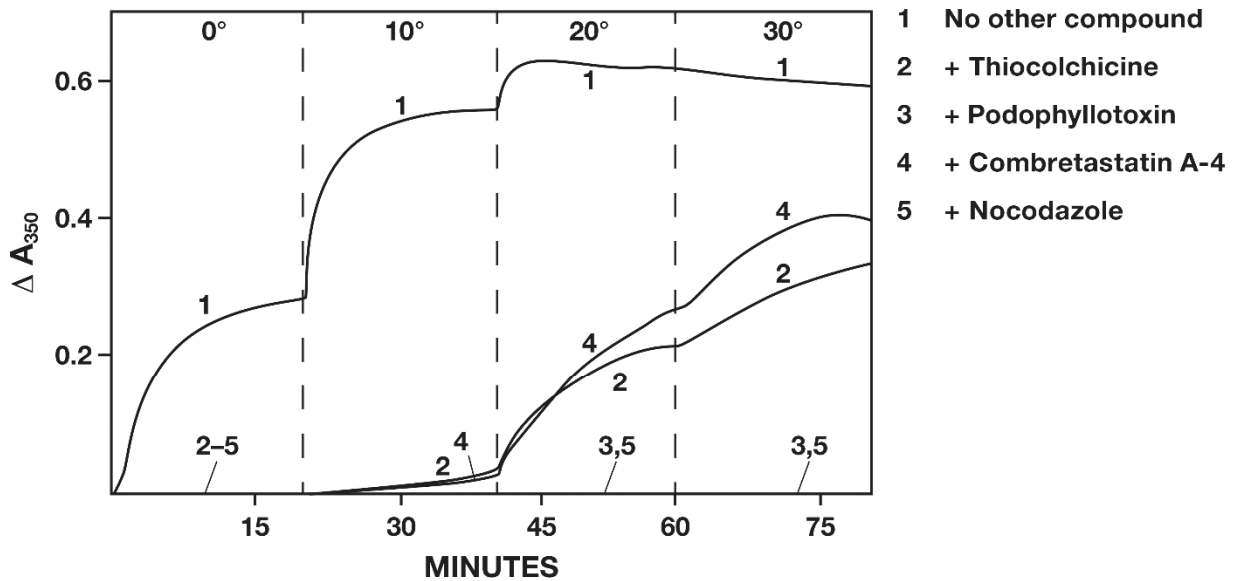

### B. (-)-Rhazinilam

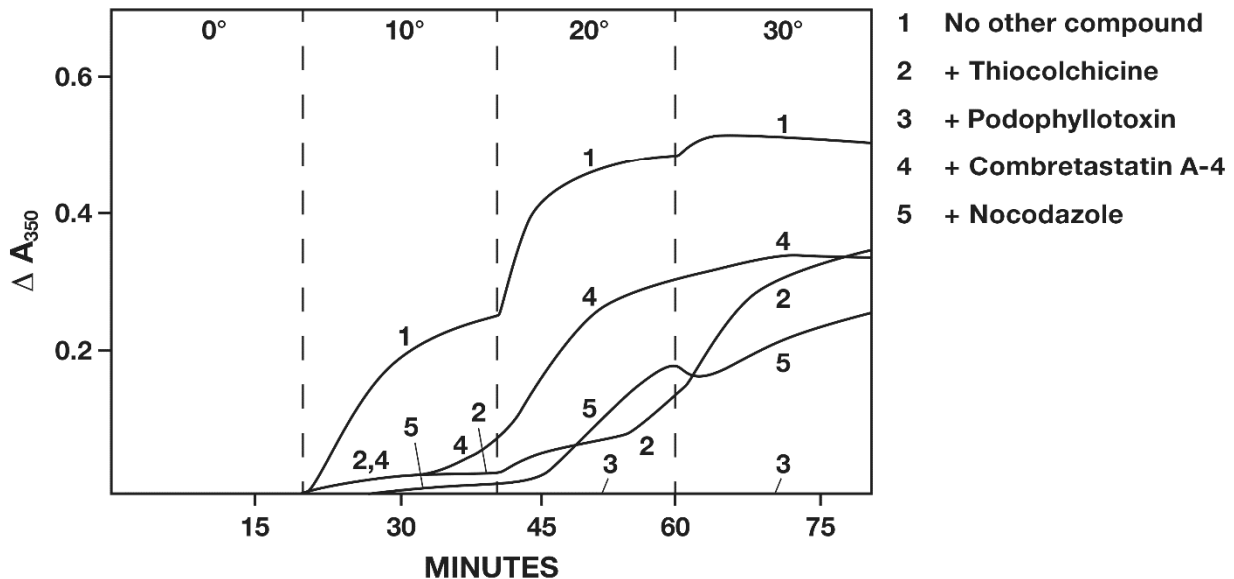

Supplementary Materials Figure 2: Inhibitory effects of colchicine site agents on aberrant assembly reactions induced by NSC 613241 (A) or by (-)-rhazinilam (B). Reaction mixtures contained the components described in the **Materials and methods** section, except for NSC 613241 or (-)-rhazinilam. The inhibitory drug was added to the other reaction components, including tubulin, in cuvettes held at 0 °C. The temperature was maintained at 0 °C for 20 min (no significant change in turbidity occurred in any sample), and at zero time either NSC 613241 (A) or (-)-rhazinilam (B) was added at 10  $\mu$ M. Temperature changes were made at the times indicated by the dashed lines, with the temperature shown at the right of the dashed lines.

Inhibitory drugs, in both panels, as follows: curves 1, none; curves 2, 50  $\mu$ M thiocolchicine (note that a preformed thiocolchicine-tubulin complex was used, as described for Table 1); curves 3, 50  $\mu$ M podophyllotoxin; curves 4, 50  $\mu$ M combretastatin A-4; curves 5, 50  $\mu$ M nocodazole.

**A. NSC 613241**

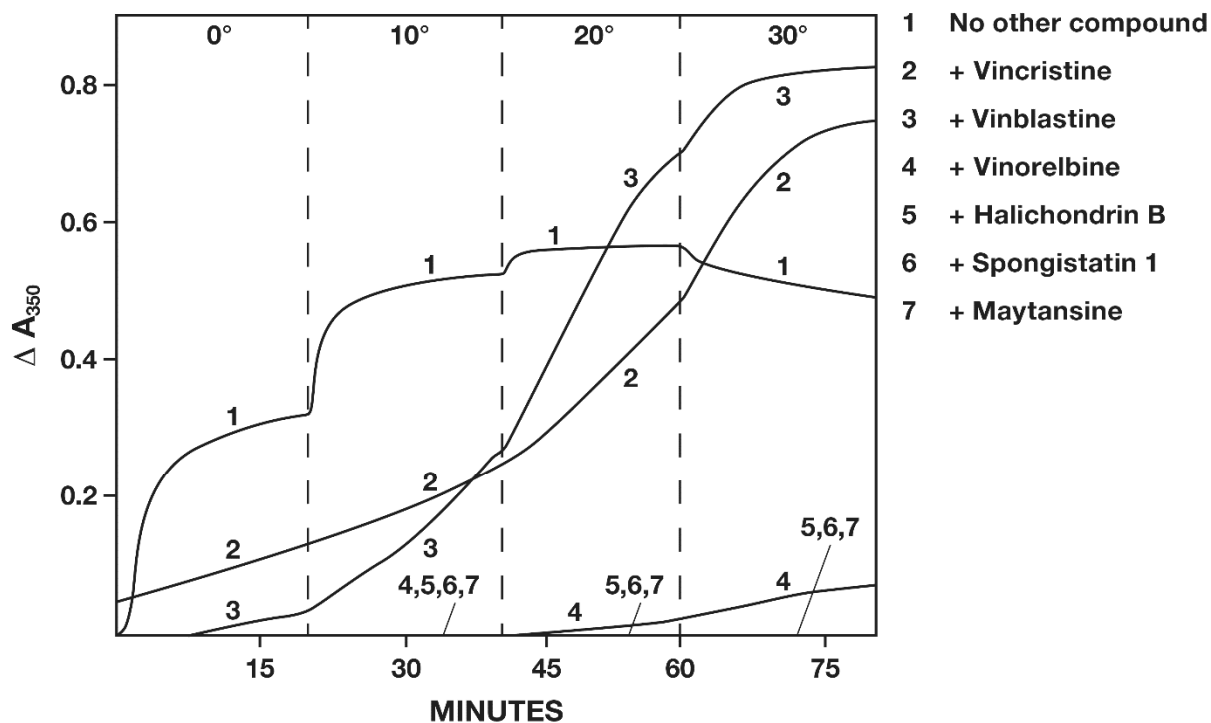

**B. (-)-Rhazinilam**

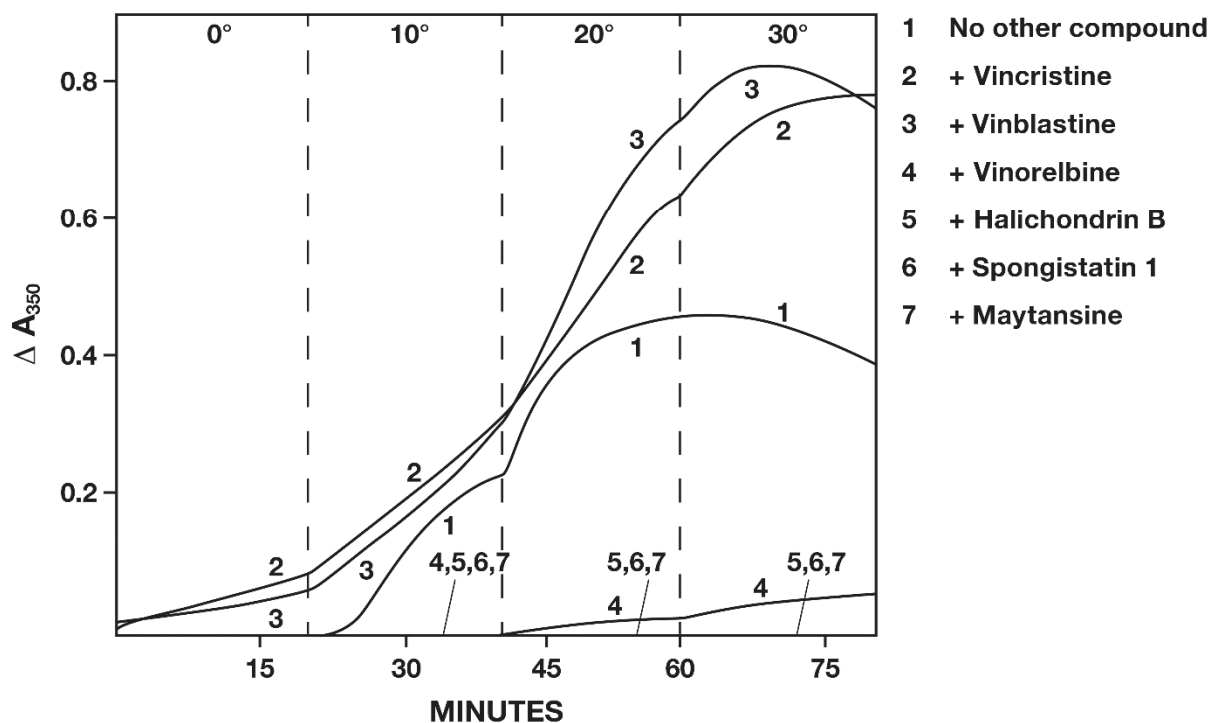

Supplementary Materials Figure 3: Inhibitory effects of compounds that inhibit vinca alkaloid binding to tubulin on aberrant assembly reactions induced by NSC 613241 (A) or by (-)-rhazinilam (B). Reaction mixtures contained the components described in the **Materials and methods**

section, except for NSC 613241 or (-)-rhazinilam. The inhibitory drug was added to the other reaction components, including tubulin, in cuvettes held at 0 °C. The temperature was maintained at 0 °C for 20 min (no significant change in turbidity occurred in any sample, except as indicated by an initial reading in the figure above the baseline), and at zero time either NSC 613241 (A) or (-)-rhazinilam (B) was added at 10 μM. Temperature changes were made at the times indicated by the dashed lines, with the temperature shown at the right of the dashed lines. Inhibitory drugs, in both panels, as follows: curves 1, none; curves 2, 50 μM vincristine; curves 3, 50 μM vinblastine; curves 4, 50 μM vinorelbine; curves 5, 50 μM halichondrin B; curves 6, 50 μM spongistatin 1; curves 7, 50 μM maytansine.

### A. NSC 613241

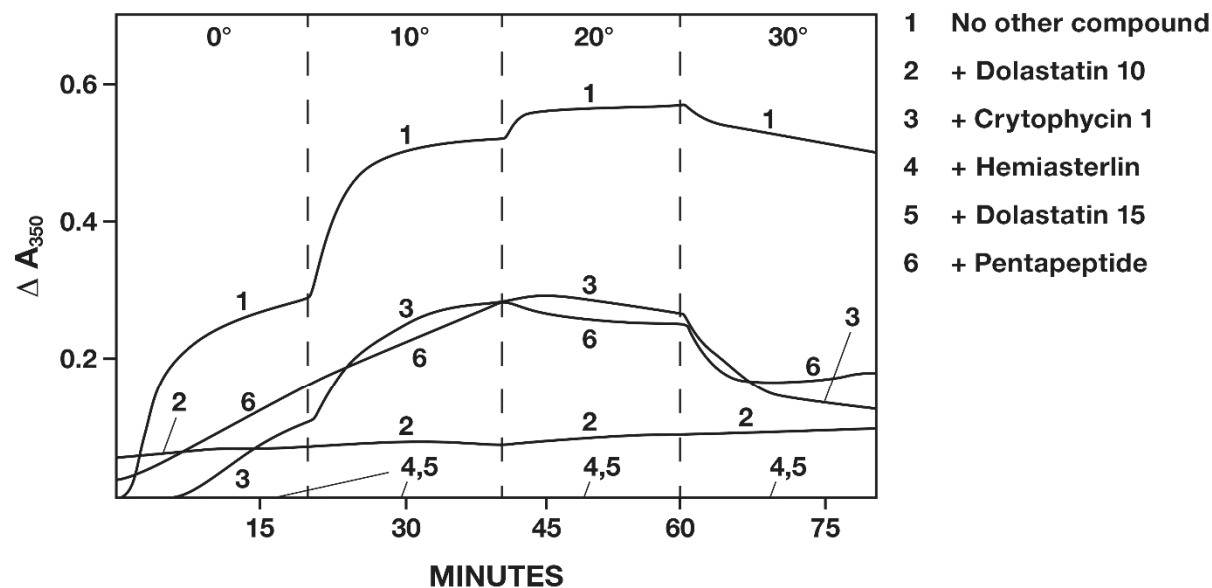

### B. (-)-Rhazinilam

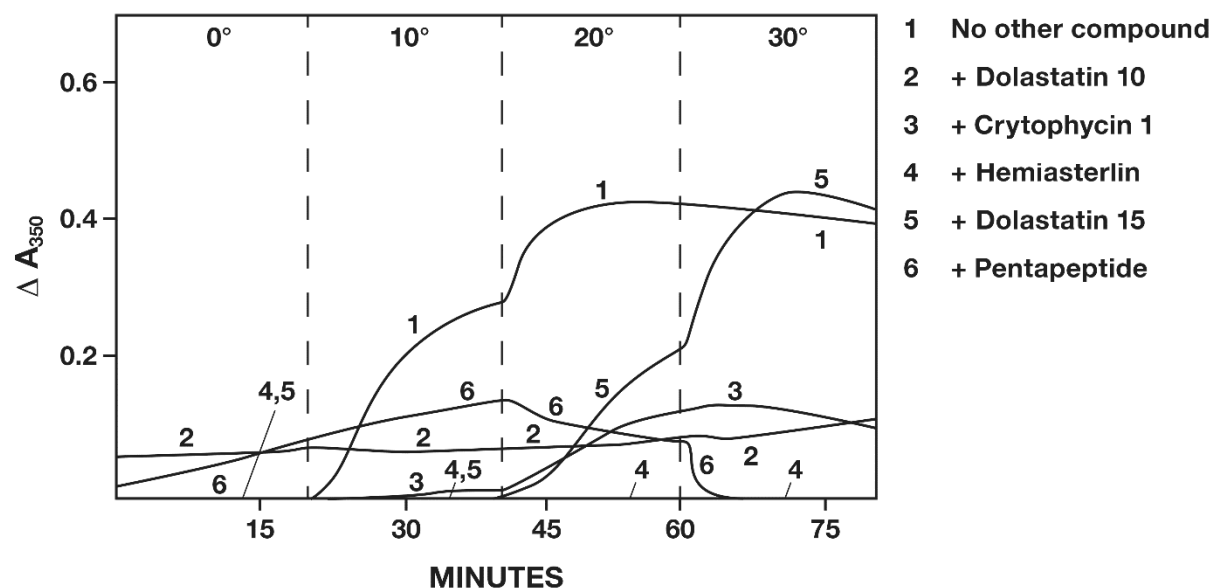

Supplementary Materials Figure 4: Inhibitory effects of antimetabolic peptides on aberrant assembly reactions induced by NSC 613241 (A) or by (-)-rhazinilam (B). Reaction mixtures contained the components described in the **Materials and methods** section, except for NSC 613241 or (-)-rhazinilam. The inhibitory drug was added to the other reaction components, including tubulin, in cuvettes held at 0 °C. The temperature was maintained at 0 °C for 20 min (no significant change in turbidity occurred in any sample, except as indicated by an initial reading in the figure above the baseline), and at zero time either NSC 613241 (A) or (-)-rhazinilam (B) was added at 10 μM. Temperature changes were made at the times indicated by the dashed lines, with the temperature shown at the right of the dashed lines. Inhibitory drugs, in both panels, as follows: curves 1, none;

curves 2, 50  $\mu\text{M}$  dolastatin 10; curves 3, 50  $\mu\text{M}$  cryptophycin 1; curves 4, 50  $\mu\text{M}$  hemiasterlin; curves 5, 50  $\mu\text{M}$  dolastatin 15; curves 6, 50  $\mu\text{M}$  *N,N*-dimethylvalyl-valyl-*N*-methylvalyl-prolyl-proline (pentapeptide).



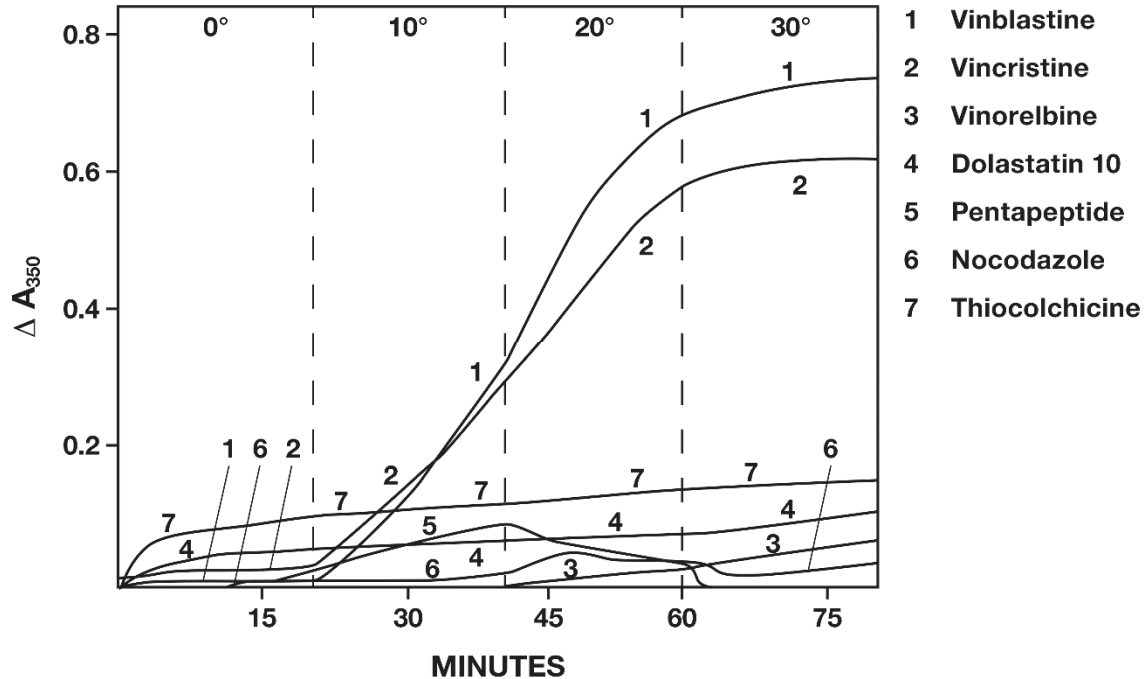

Supplementary Materials Figure 5: Turbidity patterns observed when assembly inhibitors were added to reaction mixtures containing tubulin but no NSC 613241 or (-)-rhazinilam. Reaction mixtures contained the components described in the **Materials and methods** section, and baselines were established after the addition of 10  $\mu\text{M}$  tubulin at 0  $^{\circ}\text{C}$ . At zero time, the inhibitor was added to the reaction mixture. Temperature changes were made at the times indicated by the dashed lines, with the temperature shown at the right of the dashed lines. All inhibitors were at 50  $\mu\text{M}$ . Curve 1, vinblastine; curve 2, vincristine; curve 3, vinorelbine; curve 4, dolastatin 10; curve 5, *N,N*-dimethylvalyl-valyl-*N*-methylvalyl-prolyl-proline (pentapeptide); curve 6, nocodazole; curve 7, thiocolchicine. There was no significant change in turbidity with the following inhibitors at 50  $\mu\text{M}$ : podophyllotoxin, combretastatin A-4, halichondrin B, spongistatin 1, maytansine, dolastatin 15, hemiasterlin, or cryptophycin 1.

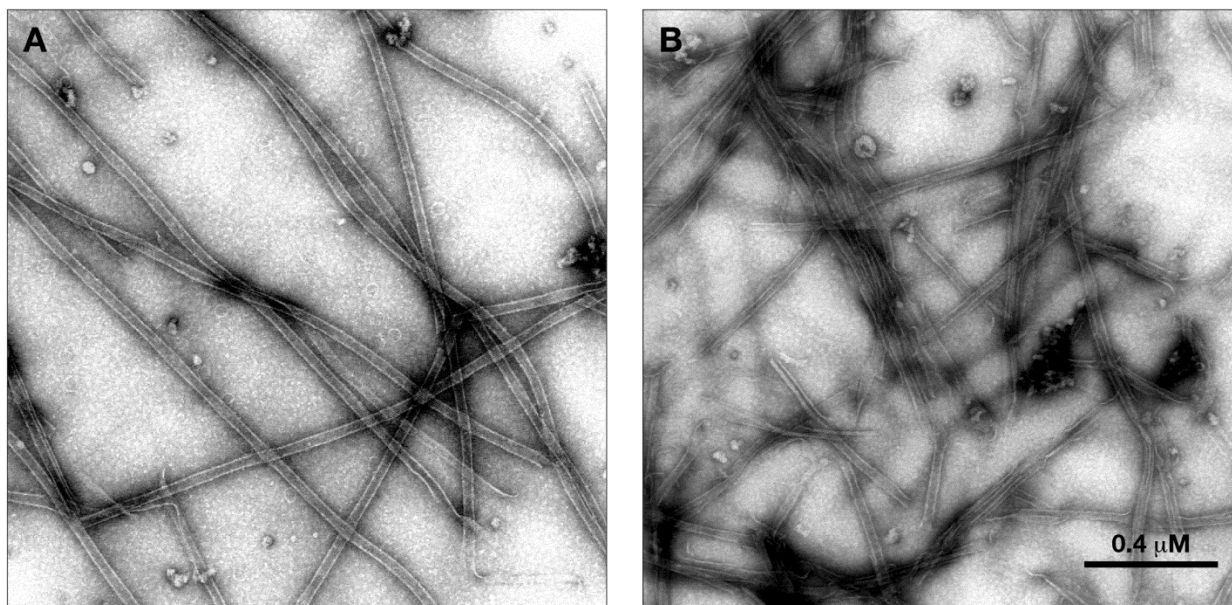

Supplementary Materials Figure 6: Predominant microtubule formation of polymer formed in the presence of laulimalide (A) or epothilone B (B). Reaction mixtures (0.25 mL) contained 10  $\mu\text{M}$  tubulin, 0.6 M monosodium glutamate (pH 6.6), 0.5 mM GTP, 1.0 mM  $\text{MgCl}_2$ , 2% dimethyl sulfoxide, and 10  $\mu\text{M}$  compound, with the laulimalide or epothilone B the last component added to the reaction mixture. After an incubation of 20 min at 0  $^\circ\text{C}$ , then 20 min at 10  $^\circ\text{C}$ , then 20 min at 20  $^\circ\text{C}$ , aliquots of each reaction mixture were applied to the grids and processed as described in **Materials and methods**. Magnification, as indicated by the bar shown in panel B, applies to both panels.

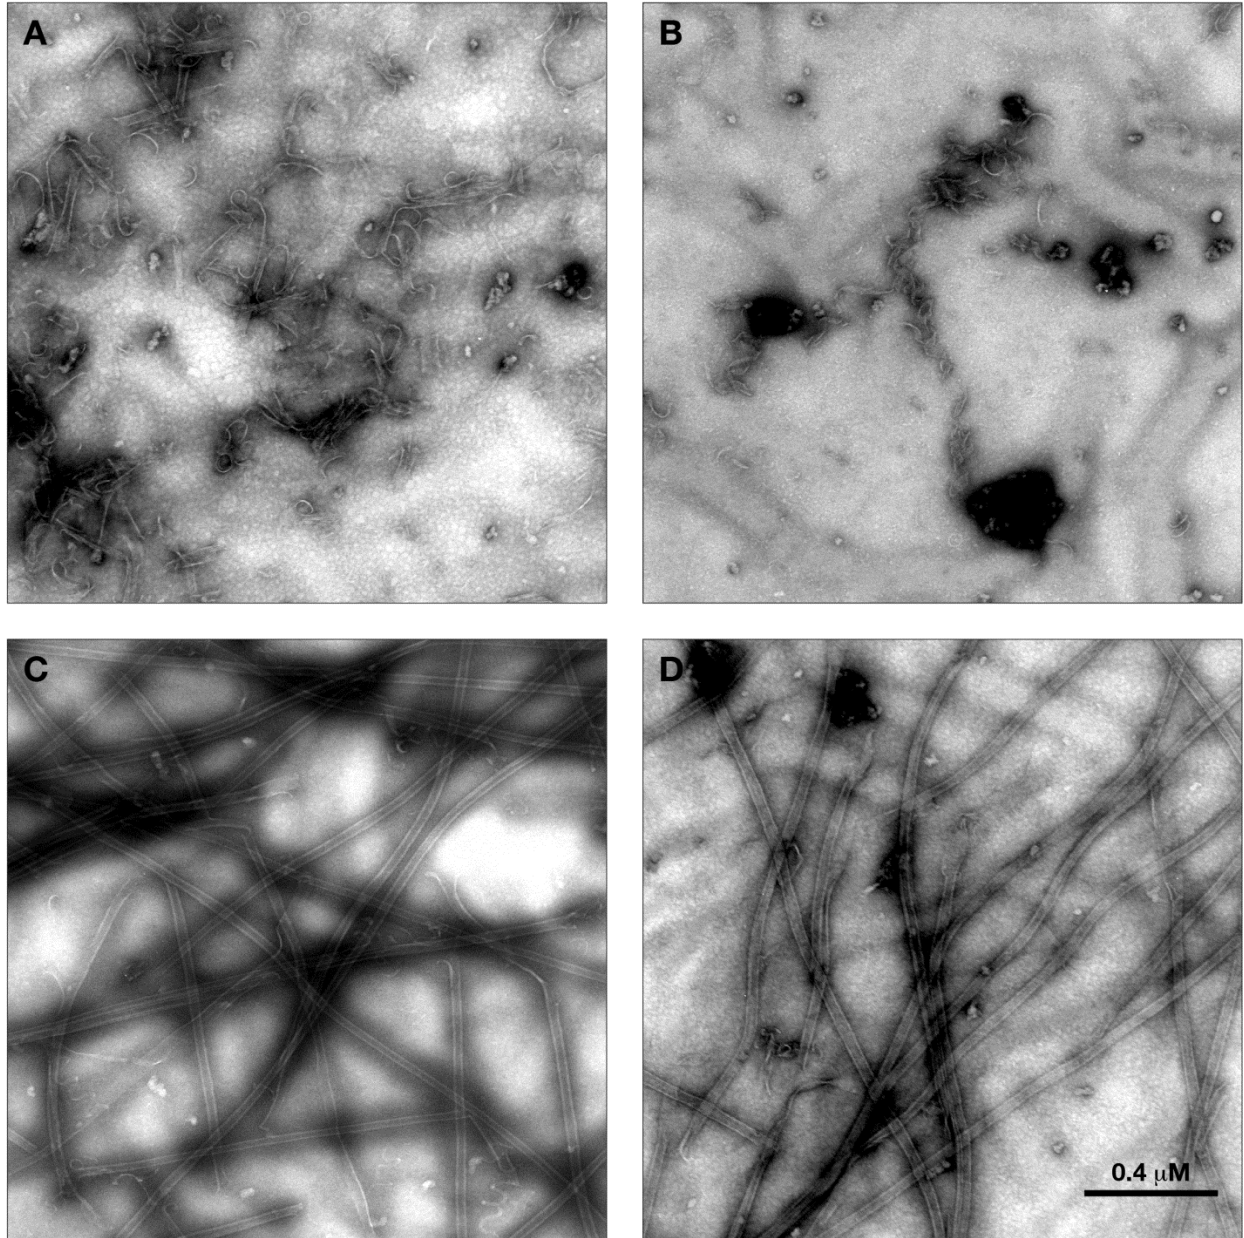

Supplementary Materials Figure 7: Effects of sequential drug additions of laulimalide with (-)-rhaznilam or NSC 613241. Reaction mixtures (0.25 mL) contained 10  $\mu$ M tubulin, 0.6 M monosodium glutamate (pH 6.6), 0.5 mM GTP, 1.0 mM  $MgCl_2$ , 2% dimethyl sulfoxide, and 10  $\mu$ M initial compound the last component added to the reaction mixture. After an incubation of 20 min at 0  $^{\circ}C$ , then 20 min at 10  $^{\circ}C$ , then 20 min at 20  $^{\circ}C$ , the second compound at 10  $\mu$ M was added. The incubation continued an additional 20 min at 20  $^{\circ}C$ . Aliquots of each reaction mixture were applied to the grids and processed as described in **Materials and methods**. Magnification, as indicated by the bar shown in panel D, applies to all panels. A. (-)-Rhaznilam was the first compound added, laulimalide the second. B. NSC 613241 was the first compound added, laulimalide the second. C. Laulimalide was the first compound added, (-)-rhaznilam the second. D. Laulimalide was the first compound added, NSC 613241 the second.

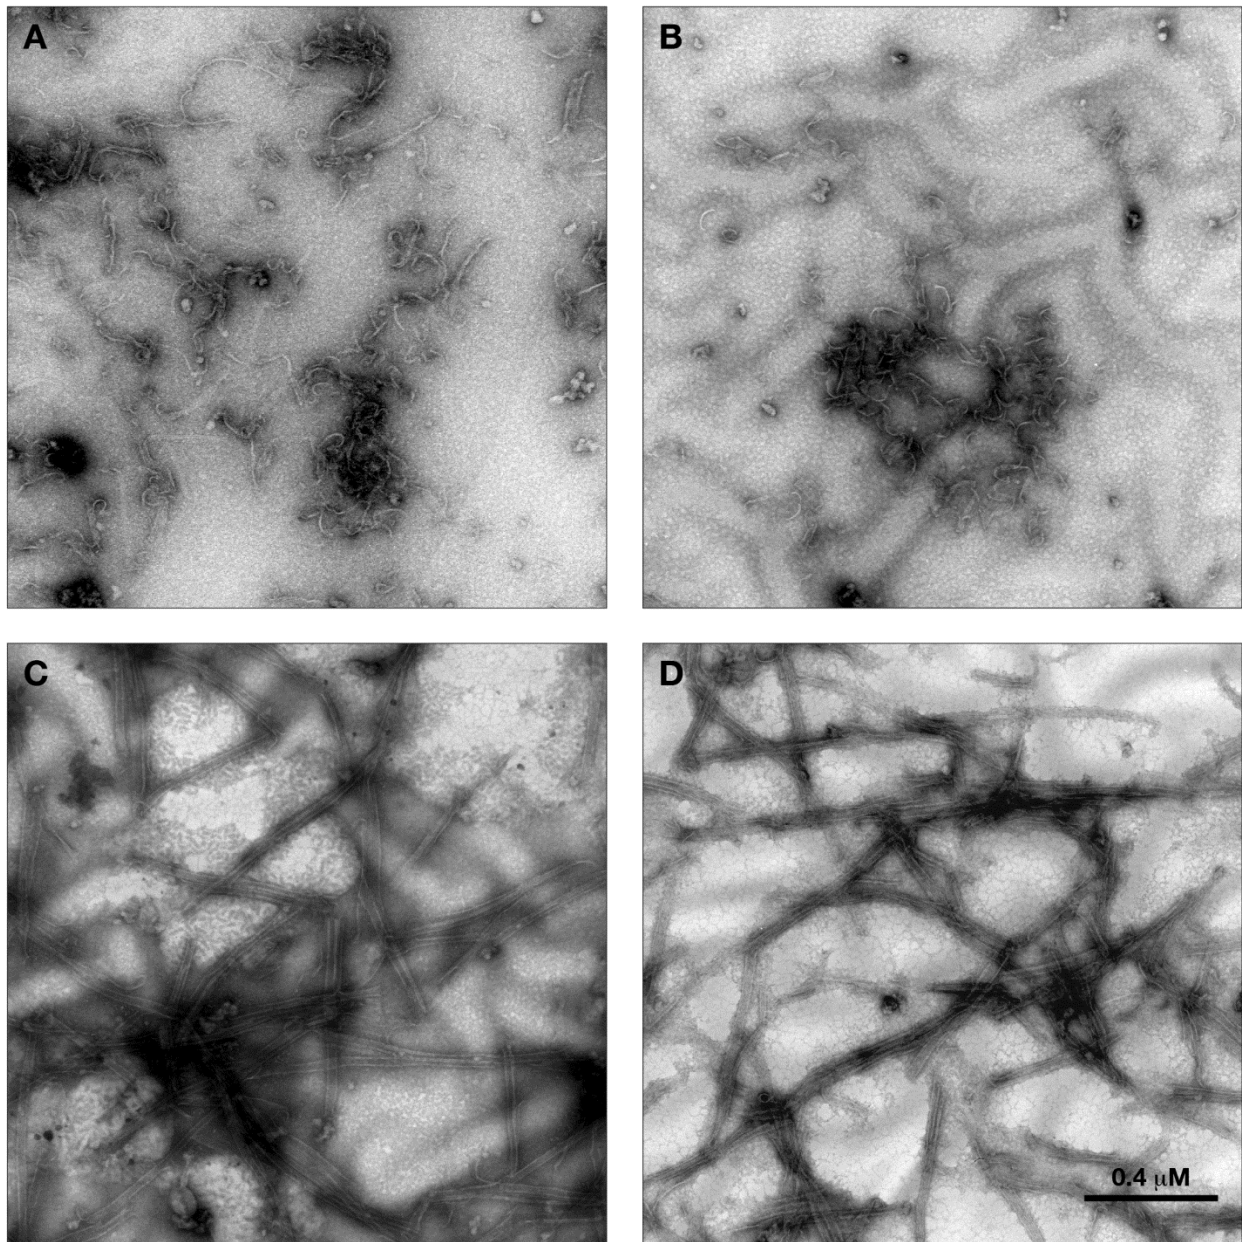

Supplementary Materials Figure 8: Effects of sequential drug additions of epothilone B with (-)-rhaznilam or NSC 613241. Reaction mixtures (0.25 mL) contained 10  $\mu$ M tubulin, 0.6 M monosodium glutamate (pH 6.6), 0.5 mM GTP, 1.0 mM  $MgCl_2$ , 2% dimethyl sulfoxide, and 10  $\mu$ M initial compound the last component added to the reaction mixture. After an incubation of 20 min at 0  $^{\circ}C$ , then 20 min at 10  $^{\circ}C$ , then 20 min at 20  $^{\circ}C$ , the second compound at 10  $\mu$ M was added. The incubation continued an additional 20 min at 20  $^{\circ}C$ . Aliquots of each reaction mixture were applied to the grids and processed as described in **Materials and methods**. Magnification, as indicated by the bar shown in panel D, applies to all panels. A. (-)-Rhaznilam was the first compound added, epothilone B the second. B. NSC 613241 was the first compound added, epothilone B the second. C. Epothilone B was the first compound added, (-)-rhaznilam the second. D. Epothilone B was the first compound added, NSC 613241 the second.

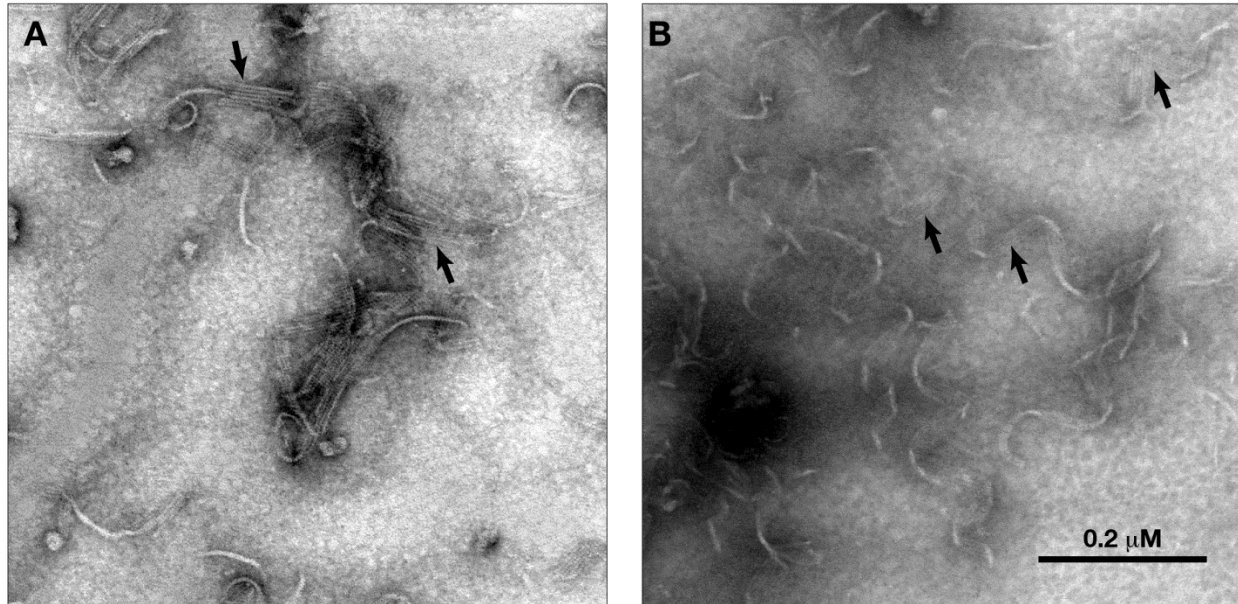

Supplementary Materials Figure 9: Higher power magnification of structures formed following sequential addition of (-)-rhazinilam, then epothilone B (A) or of NSC 613241, then epothilone B (B). Reaction mixtures (0.25 mL) contained 10  $\mu\text{M}$  tubulin, 0.6 M monosodium glutamate (pH 6.6), 0.5 mM GTP, 1.0 mM  $\text{MgCl}_2$ , 2% dimethyl sulfoxide, and 10  $\mu\text{M}$  compound of the indicated initial compound being the last component added to the reaction mixture. After an incubation of 20 min at 0  $^\circ\text{C}$ , then 20 min at 10  $^\circ\text{C}$ , then 20 min at 20  $^\circ\text{C}$ , epothilone B at 10  $\mu\text{M}$  was added with the incubation continued for 20 min at 20  $^\circ\text{C}$ . Aliquots of each reaction mixture were applied to the grids and processed as described in **Materials and methods**. Magnification, as indicated by the bar shown in panel B, applies to both panels. Arrows indicate structures with apparent parallel protofilaments.
